# Supplementary material for: Assessing long-term tephra fallout hazard in southern Italy from Neapolitan volcanoes
Source: Copernicus journal article supplement (doi:10.5194/nhess-23-2289-2023), 2023-06-23
Supplement: Supplementary file 1 [file nhess-23-2289-2023-supplement.zip]

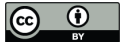

*Supplement of*

**Assessing long-term tephra fallout hazard in southern Italy from Neapolitan volcanoes**

**Silvia Massaro et al.**

*Correspondence to:* Silvia Massaro ([silvia.massaro@uniba.it](mailto:silvia.massaro@uniba.it))

- [nhess-23-2289-2023-supplement-title-page.pdf](#)
- NETCDF\_files
  - CFl.nc
  - CFm.nc
  - CFs.nc
  - IS.nc
  - VSl.nc
  - VSs.nc

The copyright of individual parts of the supplement might differ from the article licence.
